# Supplementary material for: Electrochemiluminescence of tris(2,2′-bipyridyl)ruthenium(ii)/pyruvate system in the absence of cerium(iii)
Source: Royal Society of Chemistry journal article supplement (doi:10.1039/c0ay00005a), 2010-01-01
Supplement: c0ay00005a.pdf [file c0ay00005a.pdf]

# Electrochemiluminescence of Tris(2,2'-bipyridyl)ruthenium(II) / Pyruvate system in the absence of cerium(III)

Shuang Han,<sup>a,b</sup> Haijuan Li,<sup>a,b</sup> Lianzhe Hu,<sup>a,b</sup> Yali Yuan,<sup>a,b</sup> and Guobao Xu<sup>\*a</sup>

<sup>a</sup> State Key Laboratory of Electroanalytical Chemistry, Changchun Institute of Applied Chemistry, Chinese Academy of Sciences, 5625 Renmin Street, Changchun, Jilin 130022, China.

Fax: +86-431-85262747; Tel: +86-431-85262747; E-mail: guobaoxu@ciac.jl.cn

<sup>b</sup> Graduate University of the Chinese Academy of Sciences, Beijing 100864, China

\* Corresponding author: Prof. G. B. Xu

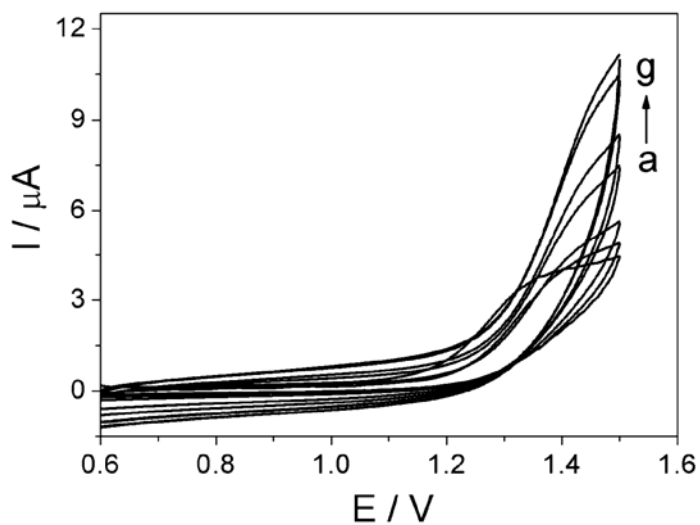

Fig. S1. Cyclic voltammograms of 1 mM pyruvate at different scan rates on the glassy carbon electrode in 0.1 M pH 1.62 PBS. The scan rate ( $\text{mV s}^{-1}$ ) from a to g: 3, 5, 10, 30, 50, 80, and 100.
